# Supplementary material for: snPATHO-seq, a versatile FFPE single-nucleus RNA sequencing method to unlock pathology archives
Source: PubMed Central journal article supplement (PMC11484811; doi:10.1038/s42003-024-07043-2), 2024-10-16
Supplement: 42003_2024_7043_MOESM3_ESM.pdf [file 42003_2024_7043_MOESM3_ESM.pdf]

## Description of Additional Supplementary Files

**File name:** Supplementary Data 1

**Description:** Clinical meta data of all samples processed

**File name:** Supplementary Data 2

**Description:** robust NMF gene modules derived from snRNA-seq and Visium data

**File name:** Supplementary Data 3

**Description:** cores genes of each robust NMF clusters (core genes: genes present in at least 2 robust NMF programs within each cluster)
